# Supplementary material
Source: ML conference proceedings conference paper supplement (https://openaccess.thecvf.com/content/CVPR2021/html/Zhu_A_Second-Order_Approach_CVPR_2021_paper.html)
Supplement: Supplementary file 1 [file Zhu_A_Second-Order_Approach_CVPR_2021_supplemental.pdf]

# Appendix

## A. Proof for Lemmas

### A.1. Proof for Lemma 1

*Proof.* We try to build the connection between noisy distribution  $\tilde{\mathcal{D}}$  and the underlying Bayes optimal distribution  $\mathcal{D}^*$  by the noise rates  $e_+$  and  $e_-$ . The primary difference from the proof of Lemma 2 in [24] is the usage of  $\mathcal{D}^*$ . Note:

$$\begin{aligned}
& \mathbb{E}_{\tilde{\mathcal{D}}}[\ell(f(X), \tilde{Y})] \\
&= \mathbb{E}_{\mathcal{D}^*} \left[ \sum_{j \in \{-1, +1\}} \mathbb{P}(\tilde{Y} = j | X, Y^*) \ell(f(X), j) \right] \\
&= \mathbb{E}_{\mathcal{D}^*} \left[ \sum_{j \in \{-1, +1\}} \mathbb{P}(\tilde{Y} = j | Y^*) \ell(f(X), j) \right] \\
&= \sum_{i \in \{-1, +1\}} \mathbb{P}(Y^* = i) \mathbb{E}_{\mathcal{D}^* | Y^* = i} [\mathbb{P}(\tilde{Y} = +1 | Y^* = i) \ell(f(X), +1) + \mathbb{P}(\tilde{Y} = -1 | Y^* = i) \ell(f(X), -1)] \\
&= \mathbb{P}(Y^* = +1) \mathbb{E}_{\mathcal{D}^* | Y^* = +1} [(1 - e_+) \ell(f(X), +1) + e_+ \ell(f(X), -1)] \\
&\quad + \mathbb{P}(Y^* = -1) \mathbb{E}_{\mathcal{D}^* | Y^* = -1} [(1 - e_-) \ell(f(X), -1) + e_- \ell(f(X), +1)].
\end{aligned}$$

Similarly, following the proof of Lemma 2 in [24], we can prove this lemma. □

### A.2. Proof for Lemma 2

**Peer Loss on the Bayes Optimal Distribution** Recall our goal is to learn a classifier  $f$  from the noisy distribution  $\tilde{\mathcal{D}}$  which also minimizes the loss on the corresponding Bayes optimal distribution  $\mathcal{D}^*$ , i.e.  $\mathbb{E}[\mathbb{1}(f(X), Y^*)], (X, Y^*) \sim \mathcal{D}^*$ . Before considering the case with label noise, we need to prove peer loss functions induce the Bayes optimal classifier when minimizing the 0-1 loss on  $\mathcal{D}^*$  as in Lemma 2.

**Lemma 2.** *Given the Bayes optimal distribution  $\mathcal{D}^*$ , the optimal peer classifier defined below:*

$$f_{peer}^* = \arg \min_f \mathbb{E}_{\mathcal{D}^*} [\mathbb{1}_{PL}(f(X), Y^*)]$$

also minimizes  $\mathbb{E}_{\mathcal{D}^*} [\mathbb{1}(f(X), Y^*)]$ .

See the proof below. It has been shown in [24] that Lemma 2 holds for the clean distribution  $\mathcal{D}$  when the clean dataset is class-balanced, i.e.  $\mathbb{P}(Y = -1) = \mathbb{P}(Y = +1) = 0.5$ . For the Bayes optimal distribution  $\mathcal{D}^*$ , as shown in Lemma 2, there is *no requirement* for the prior  $p^* := \mathbb{P}(Y^* = +1)$ .

*Proof.* Recall  $Y^*$  is the Bayes optimal label defined as

$$Y^* | X := \arg \max_Y \mathbb{P}(Y | X), (X, Y) \sim \mathcal{D}.$$

We need to prove that the ‘‘optimal peer classifier’’ defined below:

$$f_{peer}^* = \arg \min_f \mathbb{E}_{\mathcal{D}^*} [\mathbb{1}_{PL}(f(X), Y^*)]$$

is the same as the Bayes optimal classifier  $f^*$ . To see this, suppose the claim is wrong. Denote by (notations  $\epsilon_+$  and  $\epsilon_-$  are defined only for this proof):

$$\epsilon_+ := \mathbb{P}(f_{peer}^*(X) = -1 | f^*(X) = +1), \quad \epsilon_- := \mathbb{P}(f_{peer}^*(X) = +1 | f^*(X) = -1)$$

and denote by  $p^* := \mathbb{P}(f^*(X) = +1)$ . Then

$$\begin{aligned}
& \mathbb{E}_{\mathcal{D}^*}[\mathbb{1}_{\text{PL}}(f_{\text{peer}}^*(X), Y^*)] \\
&= \mathbb{P}(f_{\text{peer}}^*(X) \neq Y^*) - p^* \cdot \mathbb{P}(f_{\text{peer}}^*(X) \neq +1) - (1 - p^*) \cdot \mathbb{P}(f_{\text{peer}}^*(X) \neq -1) \\
&= p^* \cdot \epsilon_+ + (1 - p^*) \cdot \epsilon_- - p^* \cdot \mathbb{P}(f_{\text{peer}}^*(X) \neq +1) - (1 - p^*) \cdot \mathbb{P}(f_{\text{peer}}^*(X) \neq -1) \\
&= p^* \cdot \epsilon_+ + (1 - p^*) \cdot \epsilon_- \\
&- p^* \cdot (\mathbb{P}(f_{\text{peer}}^*(X) \neq +1 | f^*(X) \neq +1) \mathbb{P}(f^*(X) \neq +1) + \mathbb{P}(f_{\text{peer}}^*(X) \neq +1 | f^*(X) \neq -1) \mathbb{P}(f^*(X) \neq -1)) \\
&- (1 - p^*) \cdot (\mathbb{P}(f_{\text{peer}}^*(X) \neq -1 | f^*(X) \neq +1) \mathbb{P}(f^*(X) \neq +1) + \mathbb{P}(f_{\text{peer}}^*(X) \neq -1 | f^*(X) \neq -1) \mathbb{P}(f^*(X) \neq -1)) \\
&= p^* \cdot \epsilon_+ + (1 - p^*) \cdot \epsilon_- \\
&- p^* \cdot \mathbb{P}(f^*(X) \neq +1)(1 - \epsilon_-) - p^* \cdot \mathbb{P}(f^*(X) \neq -1) \cdot \epsilon_+ \\
&- (1 - p^*) \cdot \mathbb{P}(f^*(X) \neq -1)(1 - \epsilon_+) - (1 - p^*) \cdot \mathbb{P}(f^*(X) \neq +1) \cdot \epsilon_- \\
&= 0 - p^* \cdot \mathbb{P}(f^*(X) \neq +1) - (1 - p^*) \cdot \mathbb{P}(f^*(X) \neq -1) \\
&+ p^*(\epsilon_+ + \mathbb{P}(f^*(X) \neq +1)\epsilon_- - \mathbb{P}(f^*(X) \neq -1)\epsilon_+) \\
&+ (1 - p^*)(\epsilon_- + \mathbb{P}(f^*(X) \neq -1)\epsilon_+ - \mathbb{P}(f^*(X) \neq +1)\epsilon_-) \\
&> 0 - p^* \cdot \mathbb{P}(f^*(X) \neq +1) - (1 - p^*) \cdot \mathbb{P}(f^*(X) \neq -1) \\
&= \mathbb{E}_{\mathcal{D}^*}[\mathbb{1}_{\text{PL}}(f^*(X), Y^*)]
\end{aligned}$$

contradicting the optimality of  $f_{\text{peer}}^*$ . Thus our claim is proved.  $\square$

## B. Proof for Theorems

### B.1. Proof for Theorem 1

*Proof.* The covariance  $\text{Cov}(\cdot, \cdot)$  in this proof is taken over the Bayes optimal distribution  $\mathcal{D}^*$ . The following proof is built on the result of Theorem 2, i.e. Eq. (2). First note

$$\begin{aligned}
\text{Cov}(Z_1(X), \mathbb{1}(f_1(X), Y^*) - \mathbb{1}(f_2(X), Y^*)) &= \mathbb{E}[(Z_1(X) - \mathbb{E}[Z_1(X)]) \cdot (\mathbb{1}(f_1(X), Y^*) - \mathbb{1}(f_2(X), Y^*))] \\
&\leq \mathbb{E}[|(Z_1(X) - \mathbb{E}[Z_1(X)])|] \\
&\leq \mathbb{E}[|e_+(X) - \mathbb{E}[e_+(X)]|] + \mathbb{E}[|e_-(X) - \mathbb{E}[e_-(X)]|]
\end{aligned}$$

Similarly, one can show that

$$\text{Cov}(Z_2(X), \mathbb{1}(f_1(X), -1) - \mathbb{1}(f_2(X), -1)) \leq \mathbb{E}[|e_+(X) - \mathbb{E}[e_+(X)]|] + \mathbb{E}[|e_-(X) - \mathbb{E}[e_-(X)]|]$$

Now with bounded variance in the error rates, suppose:

$$\mathbb{E}[|e_+(X) - \mathbb{E}[e_+(X)]|] \leq \epsilon_+, \quad \mathbb{E}[|e_-(X) - \mathbb{E}[e_-(X)]|] \leq \epsilon_-$$

Note

$$\begin{aligned}
\tilde{f}_{\text{peer}}^* &:= \arg \min_f \mathbb{E}_{\tilde{\mathcal{D}}}[\mathbb{1}_{\text{PL}}(f(X), \tilde{Y})] \\
&= \arg \min_f [(1 - e_+ - e_-) \mathbb{E}_{\mathcal{D}^*}[\mathbb{1}_{\text{PL}}(f(X), Y^*) + \text{Cov}(Z_1(X), \mathbb{1}(f(X), Y^*)) + \text{Cov}(Z_2(X), \mathbb{1}(f(X), -1))] \\
&= \arg \min_f [(1 - e_+ - e_-) (\mathbb{E}_{\mathcal{D}^*}[\mathbb{1}(f(X), Y^*) - p^* \cdot \mathbb{E}_{\mathcal{D}^*}[\mathbb{1}(f(X), +1)] - (1 - p^*) \cdot \mathbb{E}_{\mathcal{D}^*}[\mathbb{1}(f(X), -1)]) \\
&\quad + \text{Cov}(Z_1(X), \mathbb{1}(f(X), Y^*)) + \text{Cov}(Z_2(X), \mathbb{1}(f(X), -1))].
\end{aligned}$$

Then

$$\begin{aligned}
& \mathbb{E}_{\mathcal{D}^*} \left[ \mathbf{1}(\tilde{f}_{\text{peer}}^*(X), Y^*) \right] + \frac{\text{Cov}(Z_1(X), \mathbf{1}(\tilde{f}_{\text{peer}}^*(X), Y^*)) + \text{Cov}(Z_2(X), \mathbf{1}(\tilde{f}_{\text{peer}}^*(X), -1))}{1 - e_+ - e_-} \\
&= \mathbb{E}_{\mathcal{D}^*} \left[ \mathbf{1}(\tilde{f}_{\text{peer}}^*(X), Y^*) \right] - 0.5 \cdot \mathbb{E}_X[\mathbf{1}(\tilde{f}_{\text{peer}}^*(X), +1)] - 0.5 \cdot \mathbb{E}_X[\mathbf{1}(\tilde{f}_{\text{peer}}^*(X), -1)] + 0.5 \\
&\quad + \frac{\text{Cov}(Z_1(X), \mathbf{1}(\tilde{f}_{\text{peer}}^*(X), Y^*)) + \text{Cov}(Z_2(X), \mathbf{1}(\tilde{f}_{\text{peer}}^*(X), -1))}{1 - e_+ - e_-} \\
&\leq \mathbb{E}_{\mathcal{D}^*} \left[ \mathbf{1}(\tilde{f}_{\text{peer}}^*(X), Y^*) \right] - p^* \cdot \mathbb{E}_X[\mathbf{1}(\tilde{f}_{\text{peer}}^*(X), +1)] - (1 - p^*) \cdot \mathbb{E}_X[\mathbf{1}(\tilde{f}_{\text{peer}}^*(X), -1)] + |p^* - 0.5| + 0.5 \\
&\quad + \frac{\text{Cov}(Z_1(X), \mathbf{1}(\tilde{f}_{\text{peer}}^*(X), Y^*)) + \text{Cov}(Z_2(X), \mathbf{1}(\tilde{f}_{\text{peer}}^*(X), -1))}{1 - e_+ - e_-} \\
&\leq \mathbb{E}_{\mathcal{D}^*} \left[ \mathbf{1}(f^*(X), Y^*) \right] - p^* \cdot \mathbb{E}_X[\mathbf{1}(f^*(X), +1)] - (1 - p^*) \cdot \mathbb{E}_X[\mathbf{1}(f^*(X), -1)] + |p^* - 0.5| + 0.5 \\
&\quad + \frac{\text{Cov}(Z_1(X), \mathbf{1}(f^*(X), Y^*)) + \text{Cov}(Z_2(X), \mathbf{1}(f^*(X), -1))}{1 - e_+ - e_-} \\
&\leq \mathbb{E}_{\mathcal{D}^*} \left[ \mathbf{1}(f^*(X), Y^*) \right] + \frac{\text{Cov}(Z_1(X), \mathbf{1}(f^*(X), Y^*)) + \text{Cov}(Z_2(X), \mathbf{1}(f^*(X), -1))}{1 - e_+ - e_-} + 2|p^* - 0.5|.
\end{aligned}$$

Thus

$$\begin{aligned}
& \mathbb{E}_{\mathcal{D}^*} \left[ \mathbf{1}(\tilde{f}_{\text{peer}}^*(X), Y^*) - \mathbf{1}(f^*(X), Y^*) \right] \\
&\leq \frac{\text{Cov}(Z_1(X), \mathbf{1}(f^*(X), Y^*) - \mathbf{1}(\tilde{f}_{\text{peer}}^*(X), Y^*)) + \text{Cov}(Z_2(X), \mathbf{1}(f^*(X), -1) - \mathbf{1}(\tilde{f}_{\text{peer}}^*(X), -1))}{1 - e_+ - e_-} + 2|p^* - 0.5| \\
&\leq 2 \frac{\mathbb{E}|e_+(X) - \mathbb{E}[e_+(X)]| + \mathbb{E}|e_-(X) - \mathbb{E}[e_-(X)]|}{1 - e_+ - e_-} + 2|p^* - 0.5| \\
&\leq \frac{2(\epsilon_+ + \epsilon_-)}{1 - e_+ - e_-} + 2|p^* - 0.5|.
\end{aligned}$$

Noting  $\mathbf{1}(f^*(X), Y^*) = 0$ , we finish the proof. □

## B.2. Proof for Theorem 2

*Proof.* The covariance  $\text{Cov}(\cdot, \cdot)$  in this proof is taken over the Bayes optimal distribution  $\mathcal{D}^*$ . Recall

$$e_+(X) := \mathbb{P}(\tilde{Y} = -1 | Y^* = +1, X), e_-(X) := \mathbb{P}(\tilde{Y} = +1 | Y^* = -1, X)$$

and

$$e_+ := \mathbb{E}_X[e_+(X)], e_- := \mathbb{E}_X[e_-(X)]$$

We first have the following equality:

$$\begin{aligned}
\mathbb{E}_{\tilde{\mathcal{D}}}[ \mathbf{1}_{\text{PL}}(f(X), \tilde{Y}) ] &= \mathbb{E}_{\mathcal{D}^*}[(1 - e_+(X) - e_-(X))\mathbf{1}(f(X), Y^*)] && \text{(Term-A)} \\
&+ \mathbb{E}_X[e_+(X)\mathbf{1}(f(X), -1) + e_-(X)\mathbf{1}(f(X), +1)] && \text{(Term-B)} \\
&- (1 - e_+ - e_-) \cdot \mathbb{E}_{\mathcal{D}^*}[\mathbf{1}(f(X), Y_p^*)] && \text{(Term-C)} \\
&- \mathbb{E}_X[e_+ \cdot \mathbf{1}(f(X), -1) + e_- \cdot \mathbf{1}(f(X), +1)] && \text{(Term-D)}
\end{aligned}$$

Term-B can be transformed to:

$$\begin{aligned}
& \mathbb{E}_X[e_+(X) \cdot \mathbf{1}(f(X), -1) + e_-(X) \cdot \mathbf{1}(f(X), +1)] \\
&= \mathbb{E}_X[e_+(X) \cdot \mathbf{1}(f(X), -1) + e_-(X) \cdot (1 - \mathbf{1}(f(X), -1))] \\
&= \mathbb{E}_X[(e_+(X) - e_-(X)) \cdot \mathbf{1}(f(X), -1) + e_-(X)].
\end{aligned}$$

Similarly, Term-D turns to

$$\mathbb{E}_X[e_+ \cdot \mathbf{1}(f(X), -1) + e_- \cdot \mathbf{1}(f(X), +1)] = (e_+ - e_-) \cdot \mathbb{E}_X[\mathbf{1}(f(X), -1)] + e_-.$$

Define two random variables

$$Z_1(X) := 1 - e_+(X) - e_-(X), \quad Z_2(X) = e_+(X) - e_-(X).$$

Then Term-A becomes

$$\begin{aligned} & \mathbb{E}_{\mathcal{D}^*}[(1 - e_+(X) - e_-(X))\mathbf{1}(f(X), Y^*)] \\ &= \mathbb{E}[Z_1(X)] \cdot \mathbb{E}_{\mathcal{D}^*}[\mathbf{1}(f(X), Y^*)] + \text{Cov}(Z_1(X), \mathbf{1}(f(X), Y^*)) \\ &= (1 - e_+ - e_-) \cdot \mathbb{E}_{\mathcal{D}^*}[\mathbf{1}(f(X), Y^*)] + \text{Cov}(Z_1(X), \mathbf{1}(f(X), Y^*)) \end{aligned}$$

Similarly, Term-B can be further transformed to

$$\begin{aligned} & \mathbb{E}_X[(e_+(X) - e_-(X)) \cdot \mathbf{1}(f(X), -1) + e_-(X)] \\ &= \mathbb{E}[Z_2(X)]\mathbb{E}_X[\mathbf{1}(f(X), -1)] + \text{Cov}(Z_2(X), \mathbf{1}(f(X), -1)) + e_- \\ &= (e_+ - e_-)\mathbb{E}_X[\mathbf{1}(f(X), -1)] + \text{Cov}(Z_2(X), \mathbf{1}(f(X), -1)) + e_- \end{aligned}$$

Combining the above results, we have

$$\begin{aligned} \mathbb{E}_{\tilde{\mathcal{D}}}[1_{\text{PL}}(f(X), \tilde{Y})] &= (1 - e_+ - e_-) \cdot \mathbb{E}_{\mathcal{D}^*}[\mathbf{1}(f(X), Y^*)] \\ &\quad + (e_+ - e_-)\mathbb{E}_X[\mathbf{1}(f(X), -1)] + e_- \\ &\quad - (1 - e_+ - e_-) \cdot \mathbb{E}_{\mathcal{D}^*}[\mathbf{1}(f(X), Y_p^*)] \\ &\quad - (e_+ - e_-) \cdot \mathbb{E}_X[\mathbf{1}(f(X), -1)] - e_- \\ &\quad + \text{Cov}(Z_1(X), \mathbf{1}(f(X), Y)) + \text{Cov}(Z_2(X), \mathbf{1}(f(X), -1)) \\ &= (1 - e_+ - e_-)\mathbb{E}_{\mathcal{D}^*}[1_{\text{PL}}(f(X), Y^*)] \\ &\quad + \text{Cov}(Z_1(X), \mathbf{1}(f(X), Y^*)) + \text{Cov}(Z_2(X), \mathbf{1}(f(X), -1)) \end{aligned}$$

□

### B.3. Proof for Theorem 3

*Proof.* From Theorem 2, we know

$$\begin{aligned} & \left[ \mathbb{E}_{\tilde{\mathcal{D}}}[1_{\text{PL}}(f(X), \tilde{Y})] - \text{Cov}(Z_1(X), \mathbf{1}(f(X), Y^*)) - \text{Cov}(Z_2(X), \mathbf{1}(f(X), -1)) \right] \\ &= (1 - e_- - e_+) \cdot \mathbb{E}_{\mathcal{D}^*}[1_{\text{PL}}(f(X), Y^*)]. \end{aligned}$$

With Lemma 2, we can finish the proof. □

### B.4. Proof for Theorem 4

*Proof.* Recall  $\tau \in [0, 1]$  is the expected ratio (a.k.a. probability) of correct examples in  $\hat{D}^\tau$ , i.e.  $\tau = \mathbb{E}[\mathbf{1}\{(X, \hat{Y}) \in \hat{D}^\tau | (X, Y^*) \in D^*\}] = \mathbb{P}((X, \hat{Y}) \sim \hat{D}^\tau | (X, Y^*) \sim D^*)$ . With  $\hat{D}^\tau$ , the classifier learned by minimizing the 0-1 CAL loss is

$$\tilde{f}_{\text{CAL-}\tau}^* := \arg \min_f \mathbb{E}_{\tilde{\mathcal{D}}} \left[ 1_{\text{PL}}(f(X), \tilde{Y}) - \text{Cov}_{\hat{D}^\tau}(Z_1(X), \mathbf{1}(f(X), \hat{Y})) - \text{Cov}_{\hat{D}^\tau}(Z_2(X), \mathbf{1}(f(X), -1)) \right].$$

Note

$$\begin{aligned} \text{Cov}_{\hat{D}^\tau}(Z_1(X), \mathbf{1}(f(X), Y)) &= \mathbb{E}_{\hat{D}^\tau} \left[ (Z_1(X) - \mathbb{E}_{\hat{D}^\tau}[Z_1(X)]) (\mathbf{1}(f(X), Y) - \mathbb{E}_{\hat{D}^\tau}[\mathbf{1}(f(X), Y)]) \right] \\ &= \mathbb{E}_{\hat{D}^\tau} \left[ (Z_1(X) - \mathbb{E}_{\hat{D}^\tau}[Z_1(X)]) \mathbf{1}(f(X), Y) \right] \\ &= \mathbb{P}((X, Y) \in D^* | (X, Y) \in \hat{D}^\tau) \mathbb{E}_{\hat{D}^\tau} \left[ (Z_1(X) - \mathbb{E}_{\hat{D}^\tau}[Z_1(X)]) \mathbf{1}(f(X), Y) | (X, Y) \in D^* \right] \\ &\quad + \mathbb{P}((X, Y) \notin D^* | (X, Y) \in \hat{D}^\tau) \mathbb{E}_{\hat{D}^\tau} \left[ (Z_1(X) - \mathbb{E}_{\hat{D}^\tau}[Z_1(X)]) \mathbf{1}(f(X), Y) | (X, Y) \notin D^* \right]. \end{aligned}$$

Similarly,

$$\begin{aligned}\text{Cov}_{\mathcal{D}^*}(Z_1(X), \mathbf{1}(f(X), Y)) &= \mathbb{E}_{\mathcal{D}^*} [(Z_1(X) - \mathbb{E}_{\mathcal{D}^*}[Z_1(X)]) \mathbf{1}(f(X), Y)] \\ &= \mathbb{P}((X, Y) \in \hat{D}^\tau | (X, Y) \in D^*) \mathbb{E}_{\mathcal{D}^*} \left[ (Z_1(X) - \mathbb{E}_{\mathcal{D}^*}[Z_1(X)]) \mathbf{1}(f(X), Y) | (X, Y) \in \hat{D}^\tau \right] \\ &\quad + \mathbb{P}((X, Y) \notin \hat{D}^\tau | (X, Y) \in D^*) \mathbb{E}_{\mathcal{D}^*} \left[ (Z_1(X) - \mathbb{E}_{\mathcal{D}^*}[Z_1(X)]) \mathbf{1}(f(X), Y) | (X, Y) \notin \hat{D}^\tau \right].\end{aligned}$$

When  $D^*$ ,  $\hat{D}^\tau$  and  $\tilde{D}$  have the same feature set, we have

$$\begin{aligned}\mathbb{P}((X, Y) \in D^* | (X, Y) \in \hat{D}^\tau) &= \mathbb{P}((X, Y) \in \hat{D}^\tau | (X, Y) \in D^*) = \tau, \\ \mathbb{P}((X, Y) \notin D^* | (X, Y) \in \hat{D}^\tau) &= \mathbb{P}((X, Y) \notin \hat{D}^\tau | (X, Y) \in D^*) = 1 - \tau.\end{aligned}$$

Therefore,

$$\text{Cov}_{\tilde{\mathcal{D}}}(Z_1(X), \mathbf{1}(f(X), Y)) - \text{Cov}_{\mathcal{D}^*}(Z_1(X), \mathbf{1}(f(X), Y)) \leq 2(1 - \tau)(\epsilon_+ + \epsilon_-).$$

The rest of the proof can be accomplished by following the proof of Theorem 1.  $\square$

## C. Proof for Corollaries

### C.1. Proof for Corollary 1

*Proof.*

$$\mathbb{E}_{\tilde{\mathcal{D}}}[l_{\text{PL}}(f(X), \tilde{Y})] = \mathbb{E}_{\tilde{\mathcal{D}}}[\ell(f(X), \tilde{Y})] - \mathbb{E}_{\tilde{\mathcal{D}}_Y} \left[ \mathbb{E}_{\mathcal{D}_X} [l(f(X_p), \tilde{Y}_p)] \right]. \quad (5)$$

The first term in (5) is

$$\begin{aligned}&\mathbb{E}_{\tilde{\mathcal{D}}}[\ell(f(X), \tilde{Y})] \\ &= \mathbb{E}_{\mathcal{D}^*} \left[ \sum_{j \in [K]} \mathbb{P}(\tilde{Y} = j | X, Y^*) \ell(f(X), j) \right] \\ &= \sum_{j \in [K]} \sum_{i \in [K]} \mathbb{P}(Y^* = i) \mathbb{E}_{\mathcal{D}^* | Y^* = i} [T_{ij}(X) \ell(f(X), j)] \\ &= \sum_{j \in [K]} \sum_{i \in [K]} \mathbb{P}(Y^* = i) [T_{ij} \mathbb{E}_{\mathcal{D}^* | Y^* = i} [\ell(f(X), j)] + \text{Cov}_{\mathcal{D}^* | Y^* = i} [T_{ij}(X), \ell(f(X), j)]] \\ &= \sum_{j \in [K]} \left[ \mathbb{P}(Y^* = j) \left( 1 - \sum_{i \neq j, i \in [K]} T_{ji} \right) \mathbb{E}_{\mathcal{D}^* | Y^* = j} [\ell(f(X), j)] + \sum_{i \in [K], i \neq j} \mathbb{P}(Y^* = i) T_{ij} \mathbb{E}_{\mathcal{D}^* | Y^* = i} [\ell(f(X), j)] \right] \\ &\quad + \sum_{j \in [K]} \sum_{i \in [K]} P(Y^* = i) \text{Cov}_{\mathcal{D}^* | Y^* = i} [T_{ij}(X), \ell(f(X), j)] \\ &= \sum_{j \in [K]} \left[ \mathbb{P}(Y^* = j) \left( 1 - \sum_{i \neq j, i \in [K]} e_i \right) \mathbb{E}_{\mathcal{D}^* | Y^* = j} [\ell(f(X), j)] + \sum_{i \in [K], i \neq j} \mathbb{P}(Y^* = i) e_j \mathbb{E}_{\mathcal{D}^* | Y^* = i} [\ell(f(X), j)] \right] \\ &\quad + \sum_{j \in [K]} \sum_{i \in [K]} P(Y^* = i) \text{Cov}_{\mathcal{D}^* | Y^* = i} [T_{ij}(X), \ell(f(X), j)] \\ &= \left( 1 - \sum_{i \in [K]} e_i \right) \mathbb{E}_{\mathcal{D}^*} [\ell(f(X), Y^*)] + \sum_{j \in [K]} \sum_{i \in [K]} \mathbb{P}(Y^* = i) e_j \mathbb{E}_{\mathcal{D}^* | Y^* = i} [\ell(f(X), j)] \\ &\quad + \sum_{j \in [K]} \sum_{i \in [K]} P(Y^* = i) \text{Cov}_{\mathcal{D}^* | Y^* = i} [T_{ij}(X), \ell(f(X), j)]\end{aligned}$$

The rest of proofs can be done following standard multi-class peer loss derivations [24].  $\square$

## D. More Discussions

### D.1. Setting Thresholds $L_{\min}$ and $L_{\max}$

In a high level, there are two strategies for setting  $L_{\min}$  and  $L_{\max}$ : 1)  $L_{\min} < L_{\max}$  and 2)  $L_{\min} = L_{\max}$ .

**Strategy-1:**  $L_{\min} < L_{\max}$ : This strategy may provide a higher ratio of true Bayes optimal labels among feasible examples in  $\hat{D}$  since some ambiguous examples are dropped. However, dropping examples changes the distribution of  $X$  (as well as the distribution of the unobservable  $Y^*$ ), a.k.a. covariate shift [14, 6]. Importance re-weighting with weight  $\gamma(X)$  is necessary for correcting the covariate shift, i.e. the weight of each feasible example  $(x, \hat{y}) \in \hat{D}$  should be changed from 1 to  $\gamma(x)$ . Let  $\mathcal{D}_X$  and  $\hat{\mathcal{D}}_X$  be the marginal distributions of  $\mathcal{D}$  and  $\hat{D}$  on  $X$ . With a particular kernel  $\Phi(X)$ , the optimization problem is:

$$\begin{aligned} \min_{\gamma(X)} \quad & \|\mathbb{E}_{\mathcal{D}_X}[\Phi(X)] - \mathbb{E}_{\hat{\mathcal{D}}_X}[\gamma(X)\Phi(X)]\| \\ \text{s.t.} \quad & \gamma(X) > 0 \text{ and } \mathbb{E}_{\hat{\mathcal{D}}_X}[\gamma(X)] = 1. \end{aligned} \tag{6}$$

The optimal solution is supposed to be  $\gamma^*(X) = \frac{\mathbb{P}_{\mathcal{D}_X}(X)}{\mathbb{P}_{\hat{\mathcal{D}}_X}(X)}$ . Note the selection of kernel  $\Phi(\cdot)$  is non-trivial, especially for complicated features [7] in DNN solutions. Using this strategy, with appropriate  $L_{\min}$  and  $L_{\max}$  such that all the examples in  $\hat{D}$  are Bayes optimal, the covariance could be guaranteed to be optimal when each example in  $\hat{D}$  is re-weighted by  $\gamma^*(X)$ .

**Strategy-2:**  $L_{\min} = L_{\max}$ : Compared with Strategy-1, we effectively lose one degree of freedom for getting a better  $\hat{D}$ . However, this is not entirely harmful since  $\hat{D}$  and  $D^*$  have the same feature set, indicating estimating  $\gamma(X)$  is no longer necessary and  $\gamma(X) = 1$  is an optimal solution for (6) with this strategy.

**Strategy selection** When we can get a high-quality  $\hat{D}$  by fine-tuning  $L_{\min}$  and  $L_{\max}$  or  $\hat{D}$  is already provided from other sources, we may solve the optimization problem in (6) to find the optimal weight  $\gamma(X)$ . However, considering the fact that estimating  $\gamma(X)$  introduces extra computation and potentially extra errors, we focus on Strategy-2 in this paper. Using Strategy-2 also reduces the effort on tuning hyperparameters. Besides, the proposed CAL loss is tolerant of an imperfect  $\hat{D}$  (shown theoretically in Section 4.3).

### D.2. Generation of Instance-Dependent Label Noise

Pseudo codes for generate instance-based label noise are provided in Algorithm 2. This algorithm follows the state-of-the-art method [40]. Define the overall noise rate as  $\eta$ .

---

#### Algorithm 2: Generating Instance-Dependent Label Noise

---

**Input:** Clean examples  $(x_n, y_n)_{n=1}^N$ ; Noise rate:  $\eta$ ; Number of classes:  $K$ ; Shape of each feature  $x_n$ :  $S \times 1$ .

- 1 Sample instance flip rates  $q_n$  from the truncated normal distribution  $\mathcal{N}(\eta, 0.1^2, [0, 1])$ ; // mean  $\eta$ , variance  $0.1^2$ , range  $[0, 1]$
- 2 Sample  $W \in \mathcal{R}^{S \times K}$  from the standard normal distribution  $\mathcal{N}(0, 1^2)$ ;
- 3 **for**  $n \in [N]$  **do**
- 4      $p = x_n^\top W$  // Generate instance dependent flip rates. The size of  $p$  is  $1 \times K$ .
- 5      $p_{y_n} = -\infty$  // Only consider entries that are different from the true label
- 6      $p = q_n \cdot \text{softmax}(p)$  // Let  $q_n$  be the probability of getting a wrong label
- 7      $p_{y_n} = 1 - q_n$  // Keep clean w.p.  $1 - q_n$
- 8     Randomly choose a label from the label space as noisy label  $\tilde{y}_n$  according to  $p$ ;
- 9 **end**

**Output:** Noisy examples  $\{(x_i, \tilde{y}_n), n \in [N]\}$ .

---

Note Algorithm 2 cannot ensure  $T_{ii}(X) > T_{ij}(X)$  when  $\eta > 0.5$ . To generate an informative dataset, we set  $0.9 \cdot T_{ii}(X)$  as the upper bound of  $T_{ij}(X)$  and distribute the remaining probability to other classes.

### D.3. Performance without Data Augmentations

For a fair comparison with the recent work on instance-dependent label noise [40], we adopt the same data augmentations as [40] and re-produce their results using the same noise file as we employed in Table 1. Each noise rate is tested 5 times with a different generation matrix  $W$  (defined in Algorithm 2). Table 4 shows the advantages of our second-order approach.

Table 4. Performance comparisons without data augmentations

| Method      | $\eta = 0.2$     | $\eta = 0.4$     |
|-------------|------------------|------------------|
| PTD-R-V[40] | $69.62 \pm 3.35$ | $64.73 \pm 3.64$ |
| CAL         | $75.52 \pm 3.94$ | $70.30 \pm 2.96$ |

### D.4. More Implementation Details on Clothing1M

**Construct  $\hat{D}$**  We first train the network for 120 epochs on 1 million noisy training images using the method in [5]. The batch-size is set to 32. The initial learning rate is set as 0.01 and reduced by a factor of 10 at 30, 60, 90 epochs. We sample 1000 mini-batches from the training data for each epoch while ensuring the (noisy) labels are balanced. Mixup [48] is adopted for data augmentations. Hyperparameter  $\beta$  is set to 0 at first 80 epochs, and linearly increased to 0.4 for next 20 epochs and kept as 0.4 for the rest of the epochs. We construct  $\hat{D}$  with the best model.

**Train with CAL** We change the loss to the CAL loss after getting  $\hat{D}$  and continue training the model (without mixup) with an initial learning rate of  $10^{-5}$  for 120 epochs (reduced by a factor of 10 at 30, 60, 90 epochs). We also tested re-train the model with  $\hat{D}$  and get an accuracy of 73.56. A randomly-collected balanced dataset with 18,976 noisy examples in each class is employed in training with CAL. Examples that are not in this balanced dataset are removed from  $\hat{D}$  for ease of implementation.
